# Supplementary material for: Alkylated histidine based short cationic antifungal peptides: synthesis, biological evaluation and mechanistic investigations
Source: Royal Society of Chemistry journal article supplement (doi:10.1039/c6ra05883c), 2016-01-01
Supplement: c6ra05883c1.pdf [file c6ra05883c1.pdf]

## **Supplementary material**

(<sup>1</sup>H, <sup>13</sup>C NMR spectra and Mass spectra of synthesized compounds)

### **Alkylated histidine based short cationic antifungal peptides: synthesis, biological evaluation and mechanistic investigations**

Sherry Mittal,<sup>a</sup> Sarabjit Kaur,<sup>a</sup> Anuradha Swami,<sup>b</sup> Indresh K. Maurya,<sup>c</sup> Rahul Jain,<sup>d</sup> Nishima Wangoo\*<sup>b</sup> and Rohit K. Sharma\*<sup>a</sup>

<sup>a</sup>*Department of Chemistry & Centre for Advanced Studies in Chemistry, Panjab University, Sector-14, Chandigarh-160014, India. Email: [rohitksg@pu.ac.in](mailto:rohitksg@pu.ac.in); Tel: +91 1722534409; Fax: +91 172 2545074*

<sup>d</sup>*Department of Applied Sciences Division, University Institute of Engineering & Technology (U.I.E.T.), Panjab University, Sector-25, Chandigarh-160014, India. Email: [nishima@pu.ac.in](mailto:nishima@pu.ac.in)*

<sup>b</sup>*Department of Microbial Biotechnology, Panjab University, Sector-14, Chandigarh-160014, India*

<sup>c</sup>*Department of Medicinal Chemistry, National Institute of Pharmaceutical Education & Research (NIPER), Sector-67, S.A.S. Nagar, Punjab-160062, India*

### Boc-His(2-t-butyl)-Arg-Arg-NHBzl (14a):

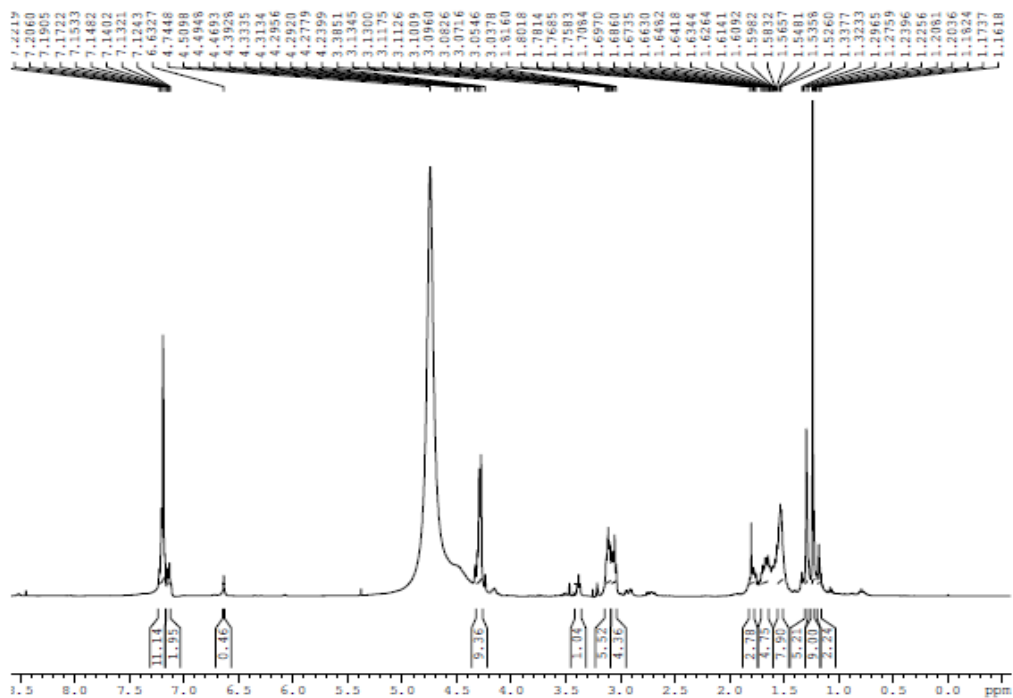

<sup>1</sup>H-NMR of Boc-His(2-t-butyl)-Arg-Arg-NHBzl (14a)

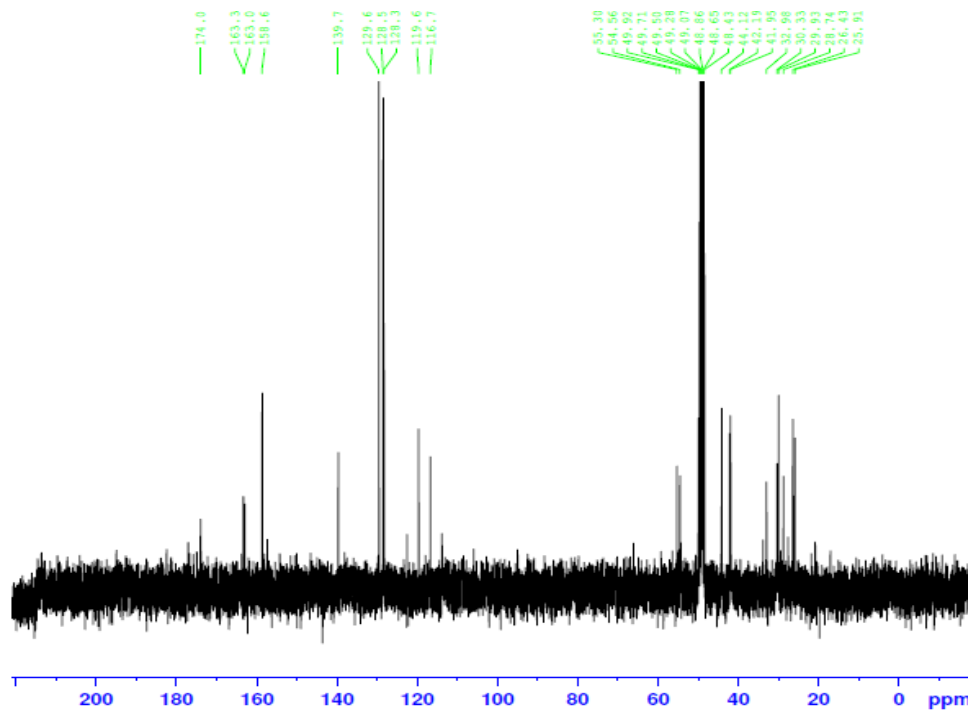

<sup>13</sup>C-NMR of Boc-His(2-t-butyl)-Arg-Arg-NHBzl (14a)

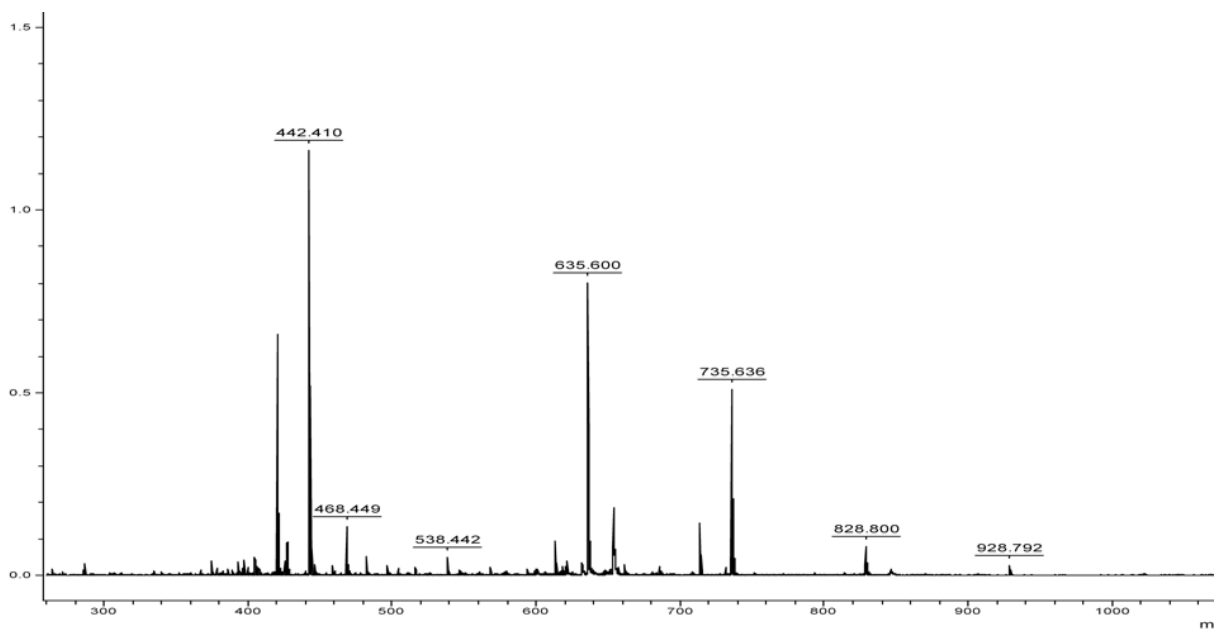

MALDI- MS of Boc-His(2-t-butyl)-Arg-Arg-NHBzl (**14a**),  $[MH]^+$  713.64

**Boc-His(2-cyclohexyl)-Arg-Arg-NHBzl (**14b**):**

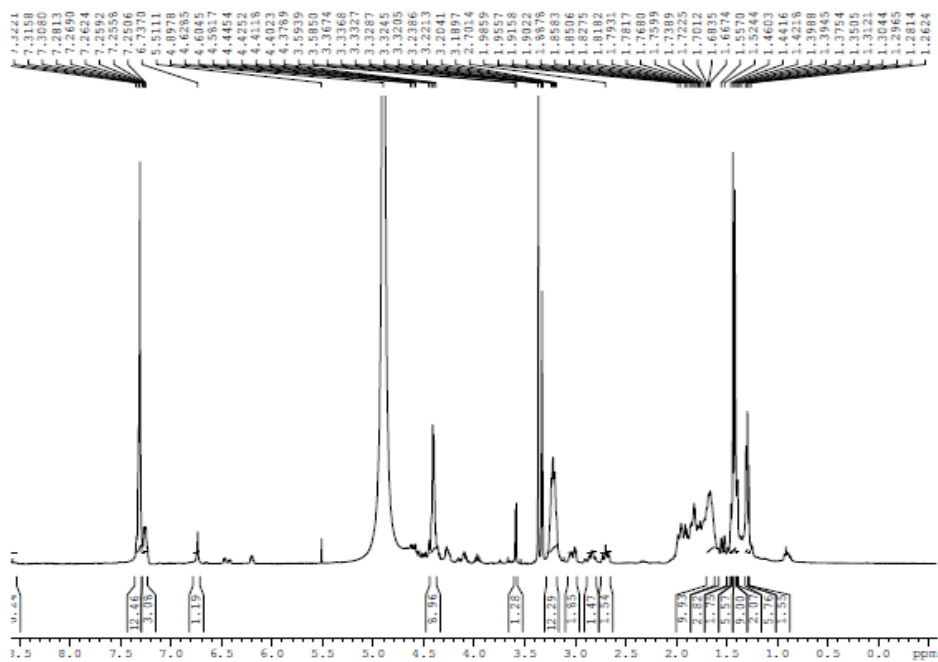

$^1H$ -NMR of Boc-His(2-cyclohexyl)-Arg-Arg-NHBzl (**14b**)

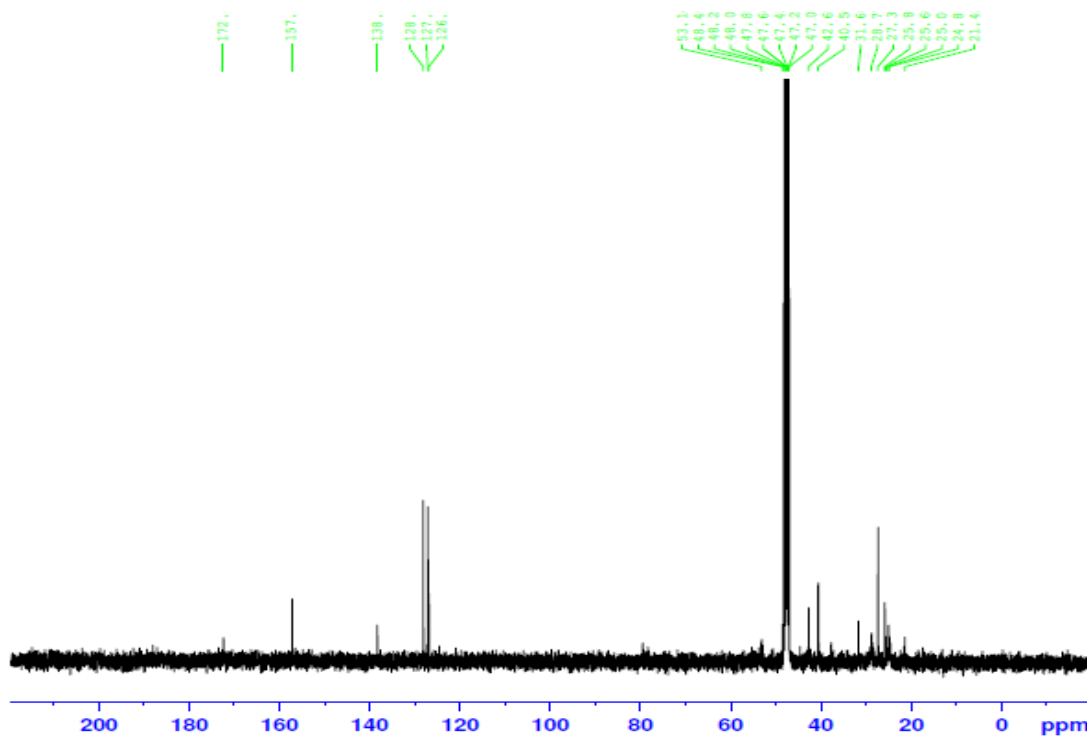

$^{13}\text{C}$ -NMR of Boc-His(2-cyclohexyl)-Arg-Arg-NHBzl (**14b**)

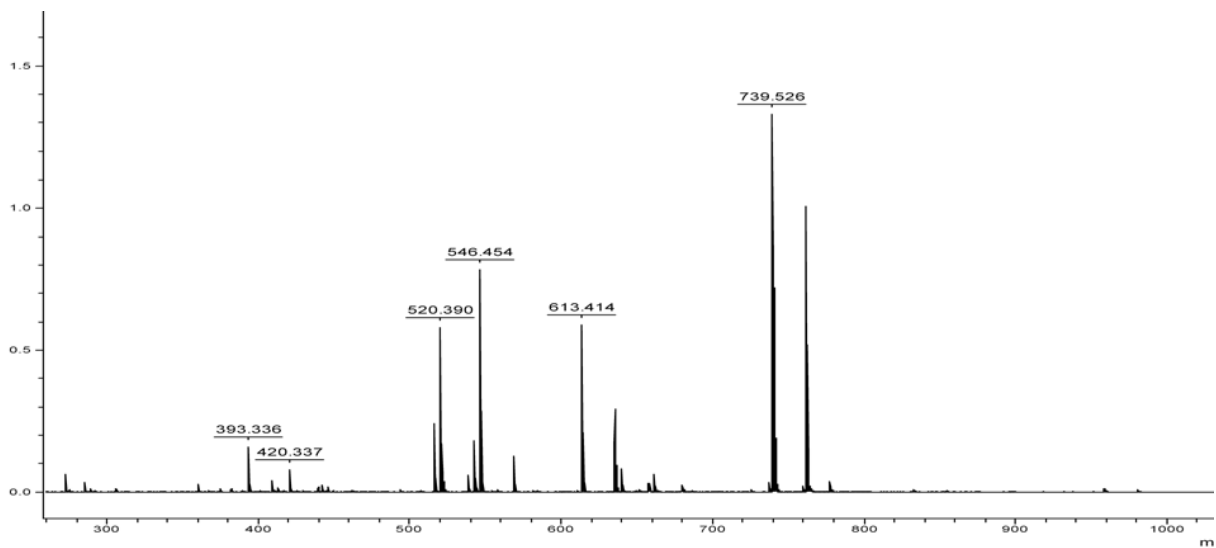

MALDI-MS of Boc-His(2-cyclohexyl)-Arg-Arg-NHBzl (**14b**),  $[\text{MH}]^+$  739.52

**Boc-His(2-i-propyl)-Arg-Arg-NHBzl (14c):**

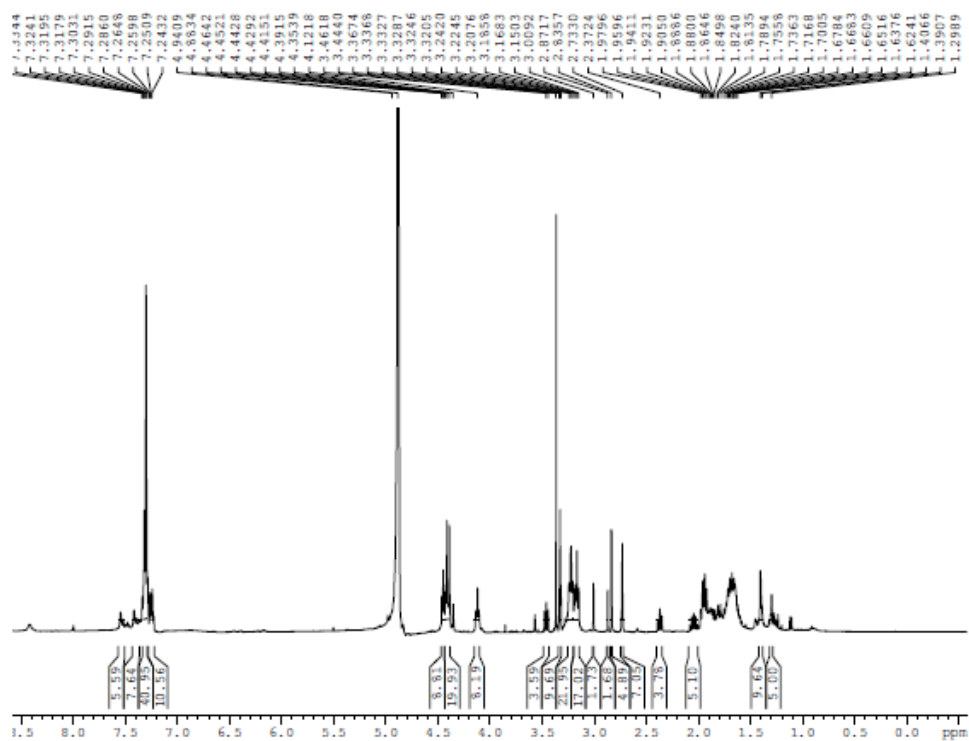

<sup>1</sup>H-NMR of Boc-His(2-propyl)-Arg-Arg-NHBzl (14c)

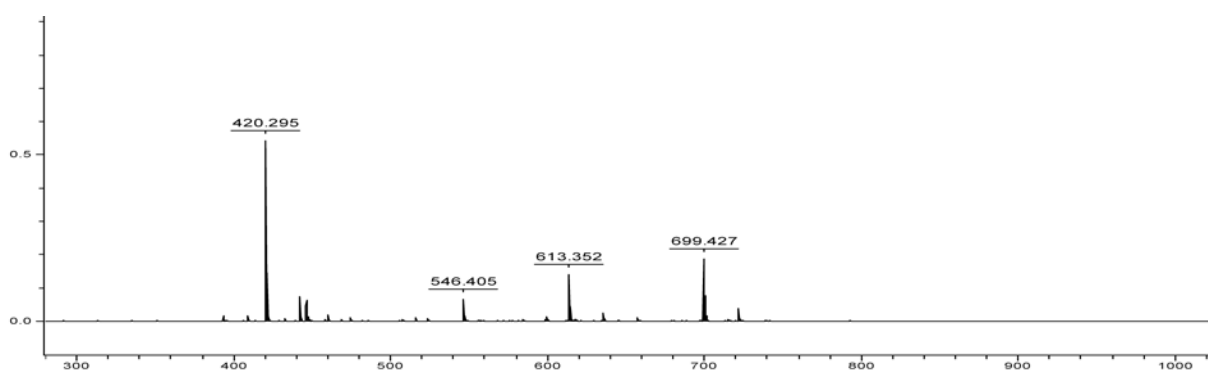

MALDI-MS of Boc-His(2-i-propyl)-Arg-Arg-NHBzl (14c), [MH]<sup>+</sup> 699.42

**Boc-His(2-cyclobutyl)-Arg-Arg-NHBzl (14d):**

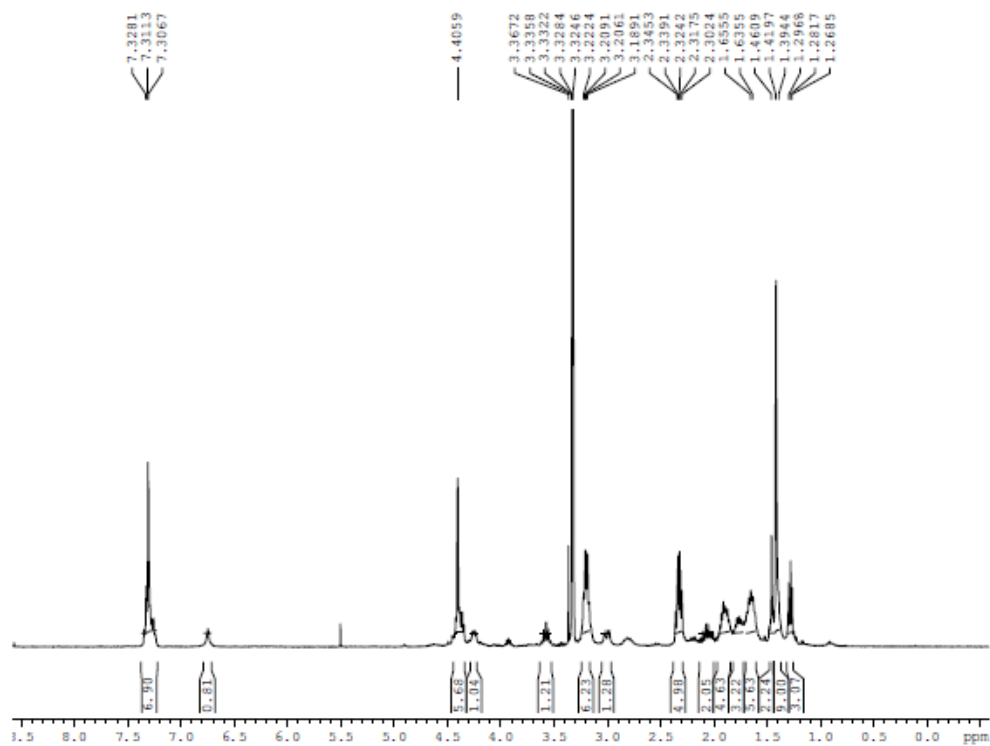

<sup>1</sup>H-NMR of Boc-His(2-cyclobutyl)-Arg-Arg-NHBzl (14d)

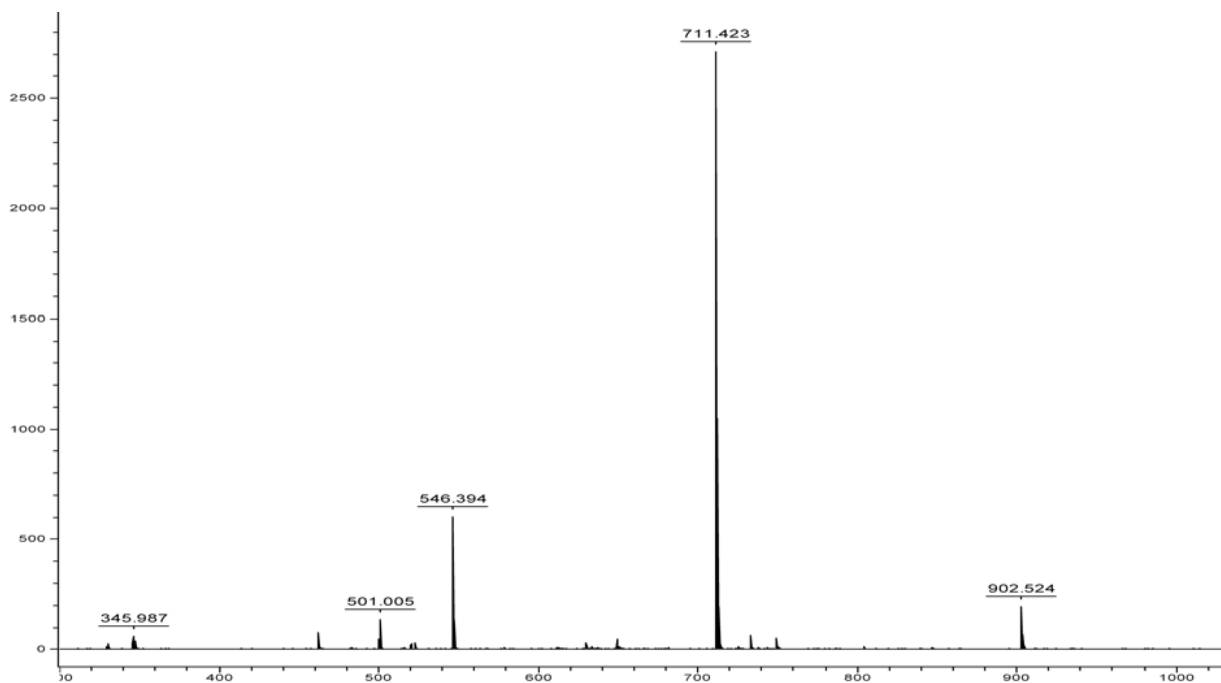

MALDI-MS of Boc-His(2-cyclobutyl)-Arg-Arg-NHBzl (14d), [MH]<sup>+</sup> 711.42



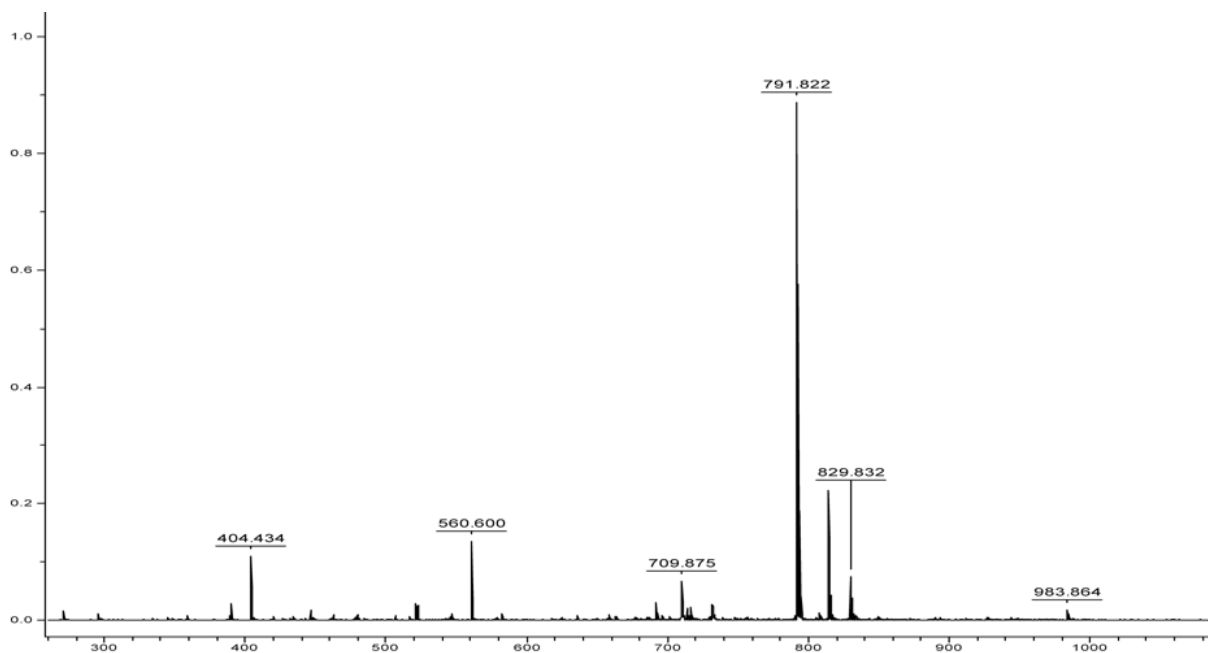

MALDI-MS of Boc-His(2-adamantyl)-Arg-Arg-NHBzl (**14e**),  $[MH]^+$  791.82

**Boc-His-Arg-Arg-NHBzl (14f):**

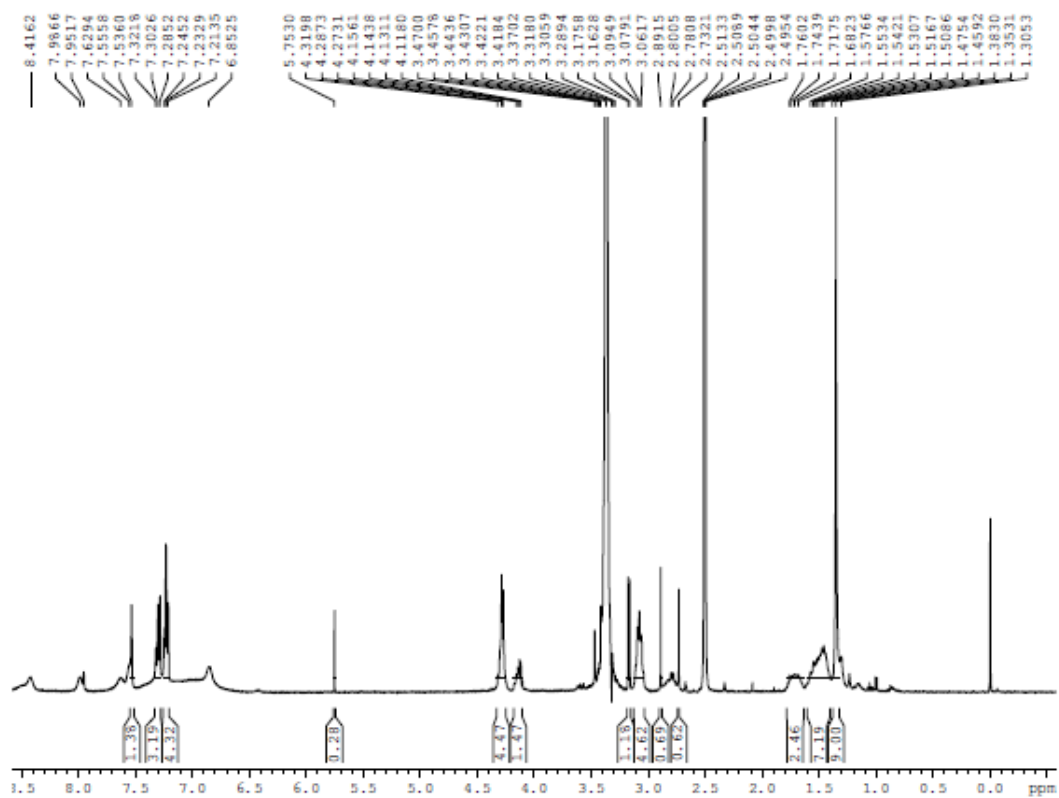

$^1H$ -NMR of Boc-His-Arg-Arg-NHBzl (**14f**)



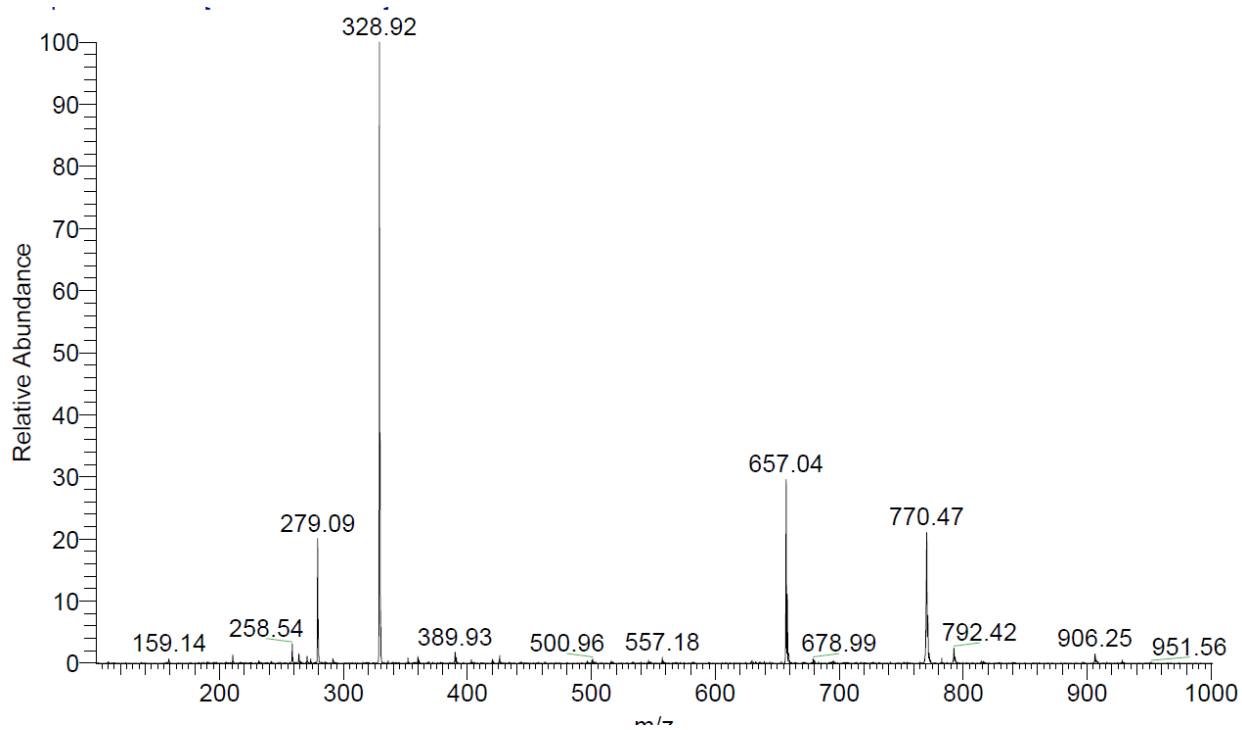

MS of Boc-His-Arg-Arg-NHBzl (**14f**),  $[MH]^+$  657.04

**His(2-t-butyl)-Arg-Arg-NHBzl (15a):**

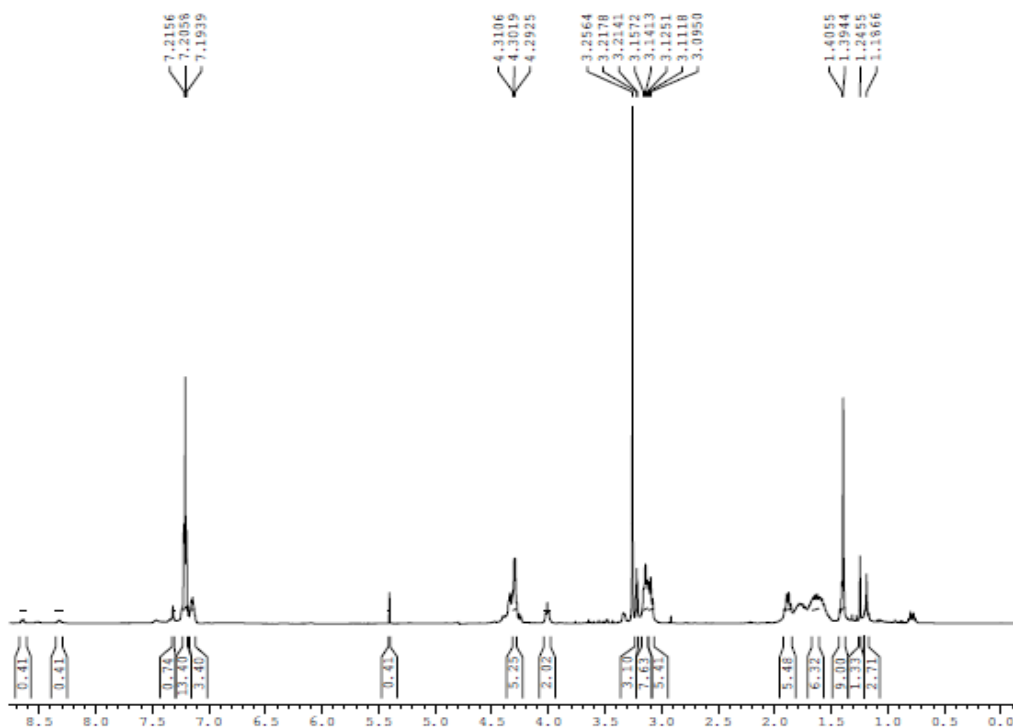

$^1H$ -NMR of His(2-t-butyl)-Arg-Arg-NHBzl (**15a**)

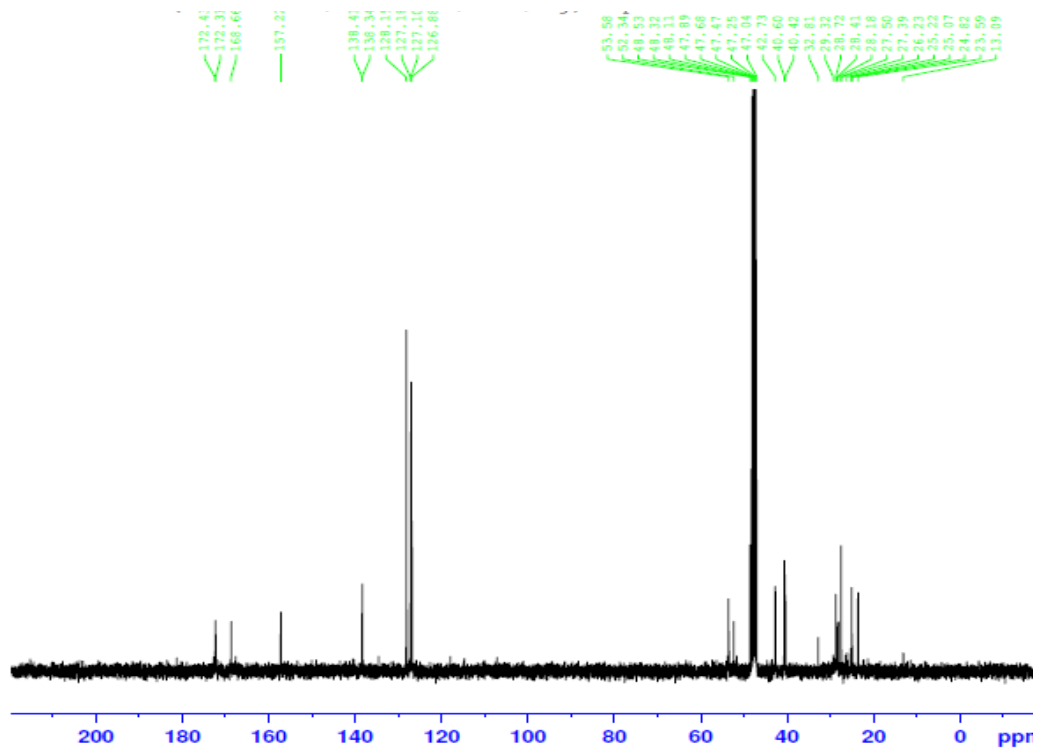

$^{13}\text{C}$ -NMR of His(2-t-butyl)-Arg-Arg-NHBzl (**15a**)

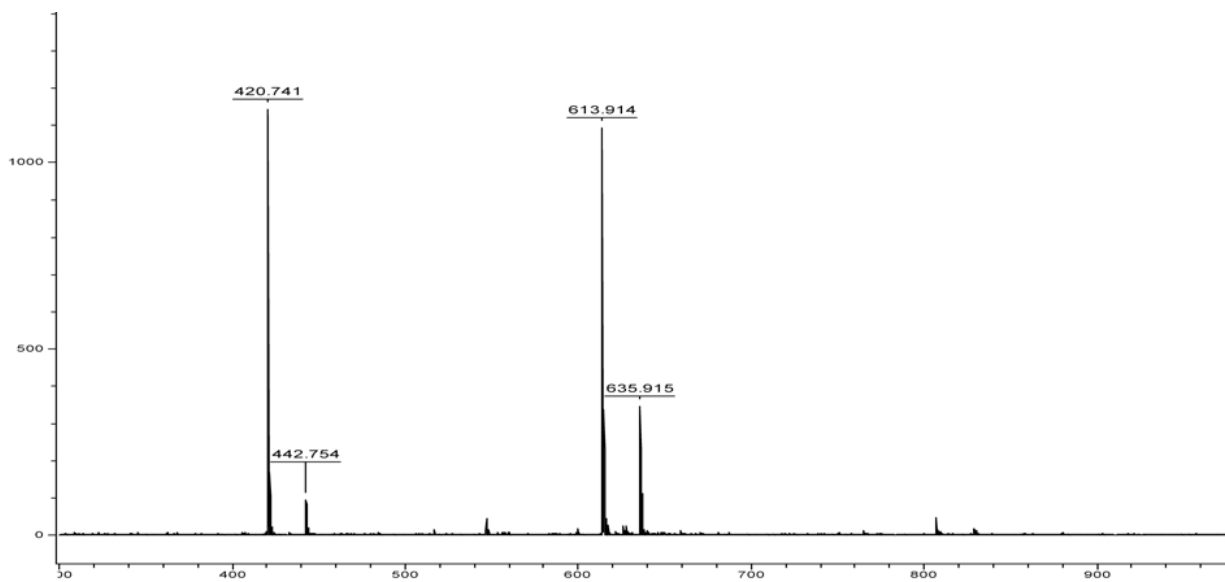

MALDI- MS of His-(2-t-butyl)-Arg-Arg-NHBzl (**15a**),  $[\text{MH}]^+$  613.91

### His(2-cyclohexyl)-Arg-Arg-NHBzl (15b):

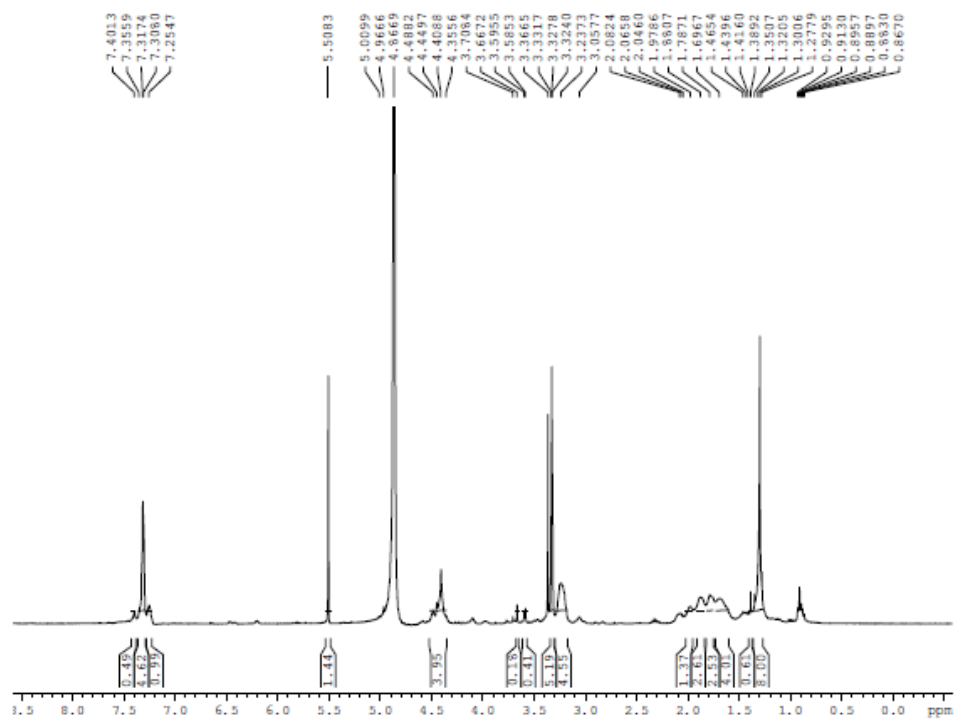

<sup>1</sup>H-NMR of His(2-cyclohexyl)-Arg-Arg-NHBzl (15b)

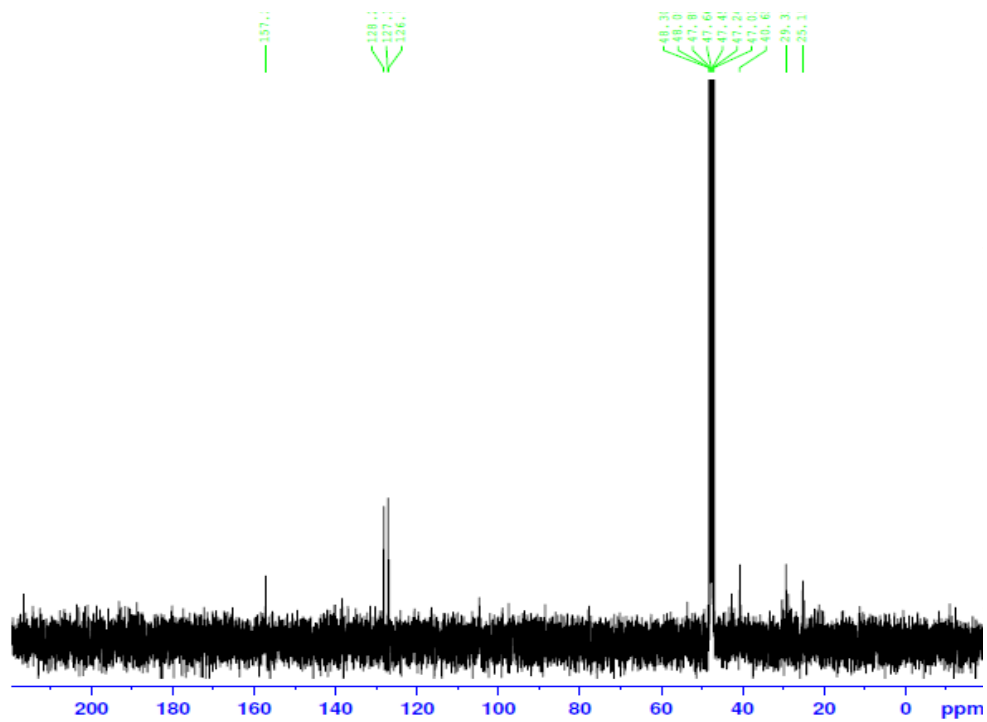

<sup>13</sup>C-NMR of His(2-cyclohexyl)-Arg-Arg-NHBzl (15b)

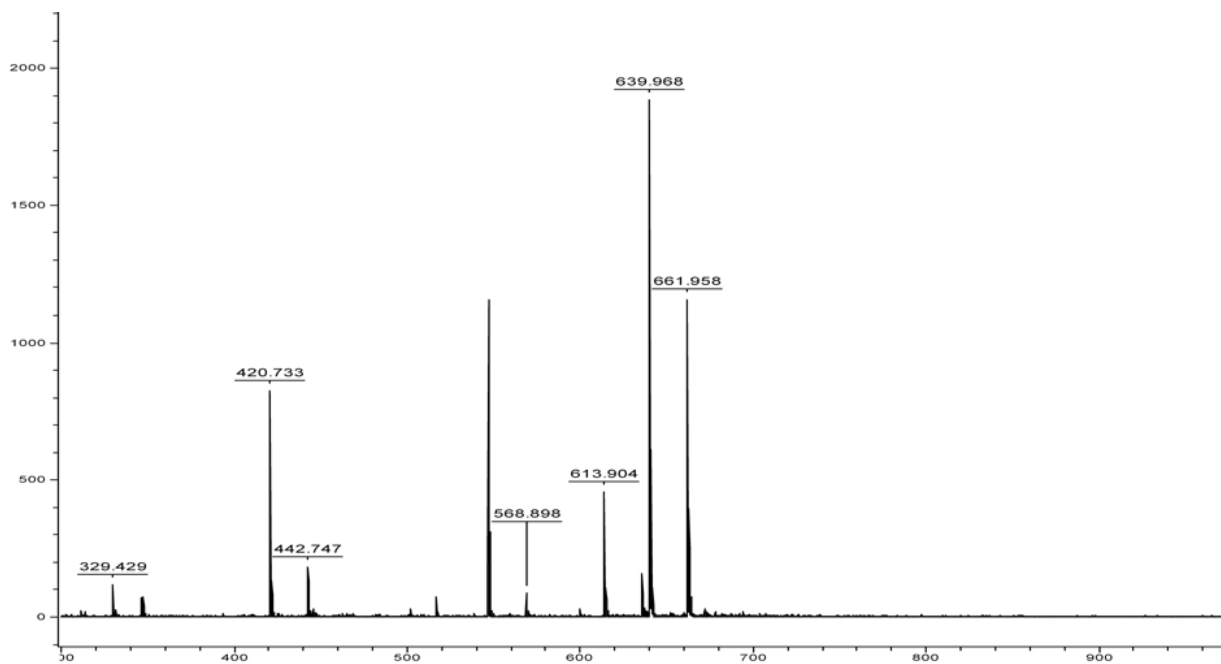

MALDI-MS of His(2-cyclohexyl)-Arg-Arg-NHBzl (**15b**),  $[MH]^+$  639.96

**His(2-i-propyl)-Arg-Arg-NHBzl (15c):**

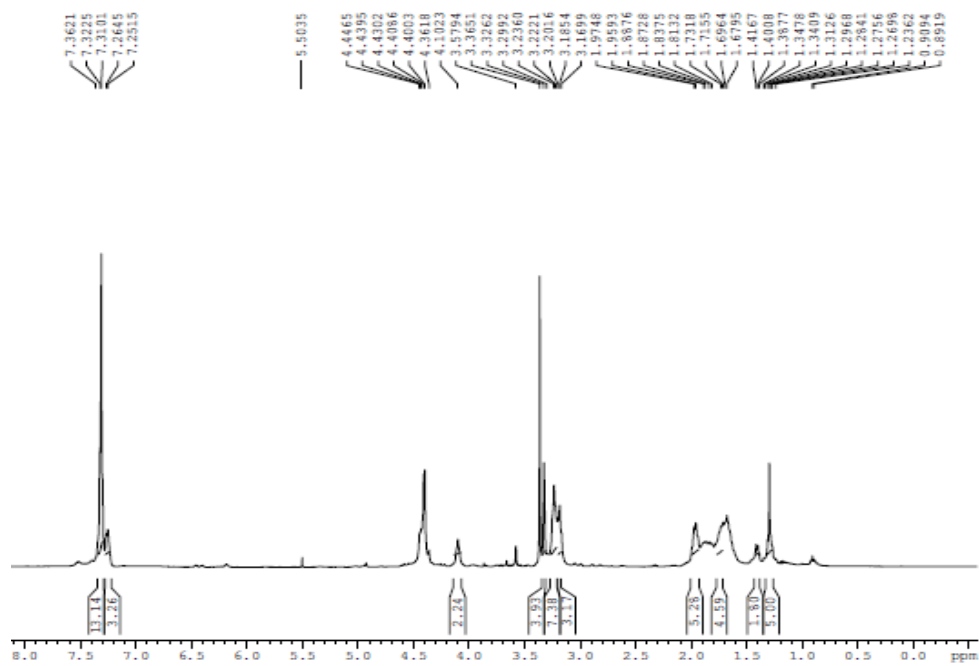

$^1H$ -NMR of His(2-i-propyl)-Arg-Arg-NHBzl (**15c**)

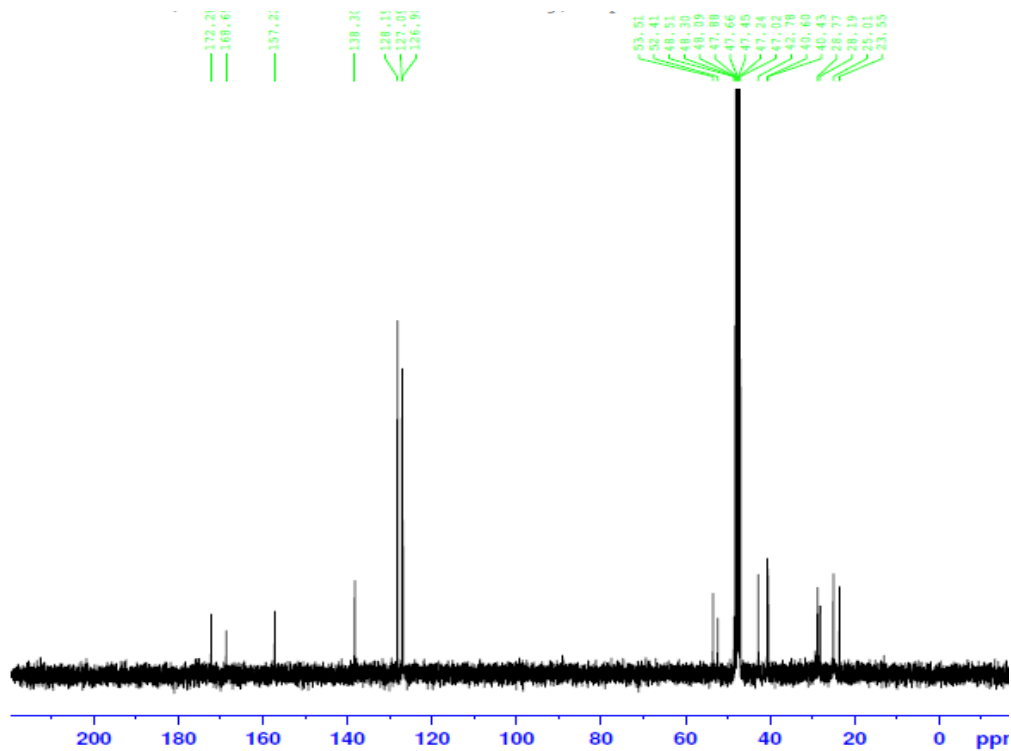

<sup>13</sup>C-NMR of His(2-i-propyl)-Arg-Arg-NHBzl (15c)

**His(2-cyclobutyl)-Arg-Arg-NHBzl (15d):**

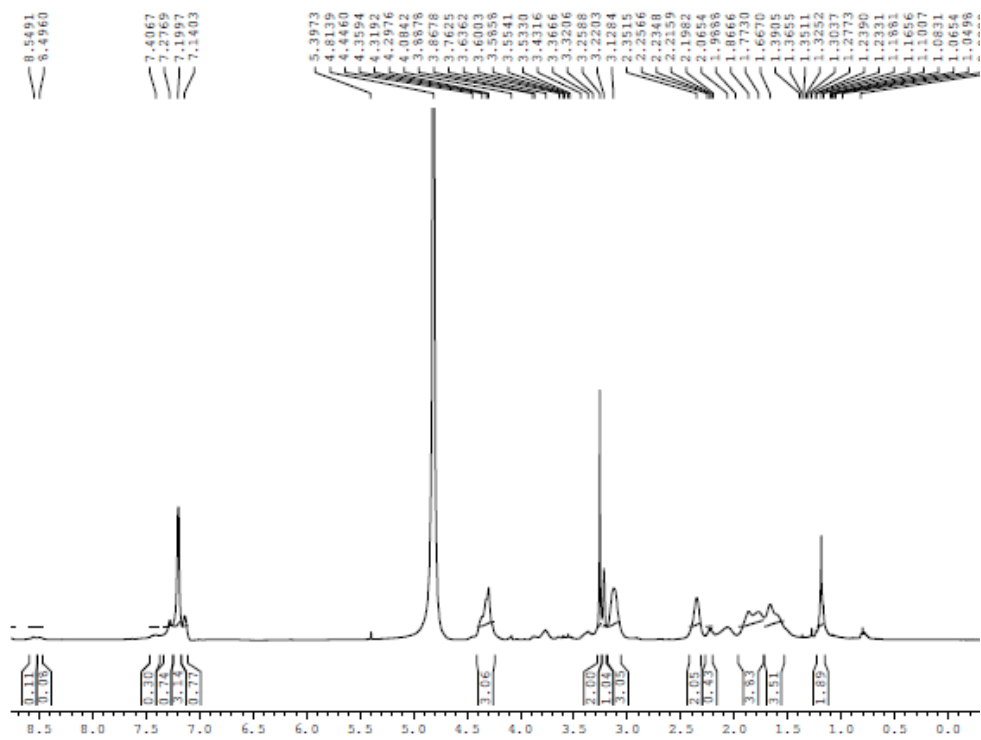

<sup>1</sup>H-NMR of His(2-cyclobutyl)-Arg-Arg-NHBzl (15d)

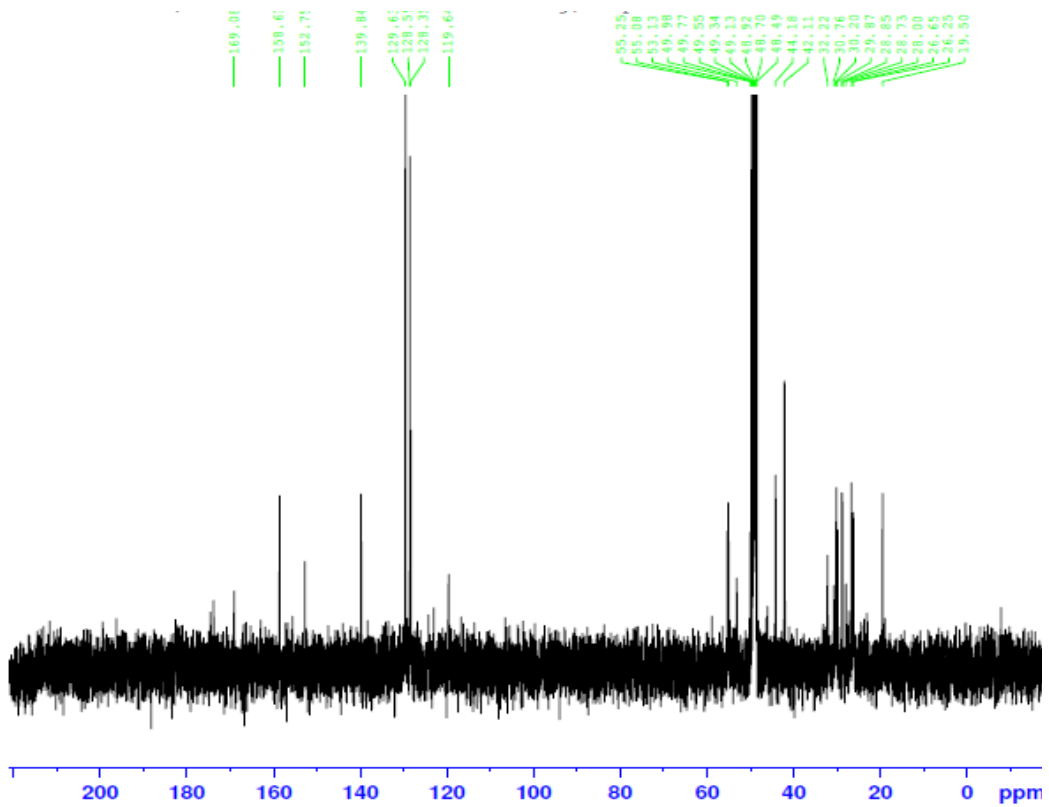

$^{13}\text{C}$ -NMR of His(2-cyclobutyl)-Arg-Arg-NHBzl (**15d**)

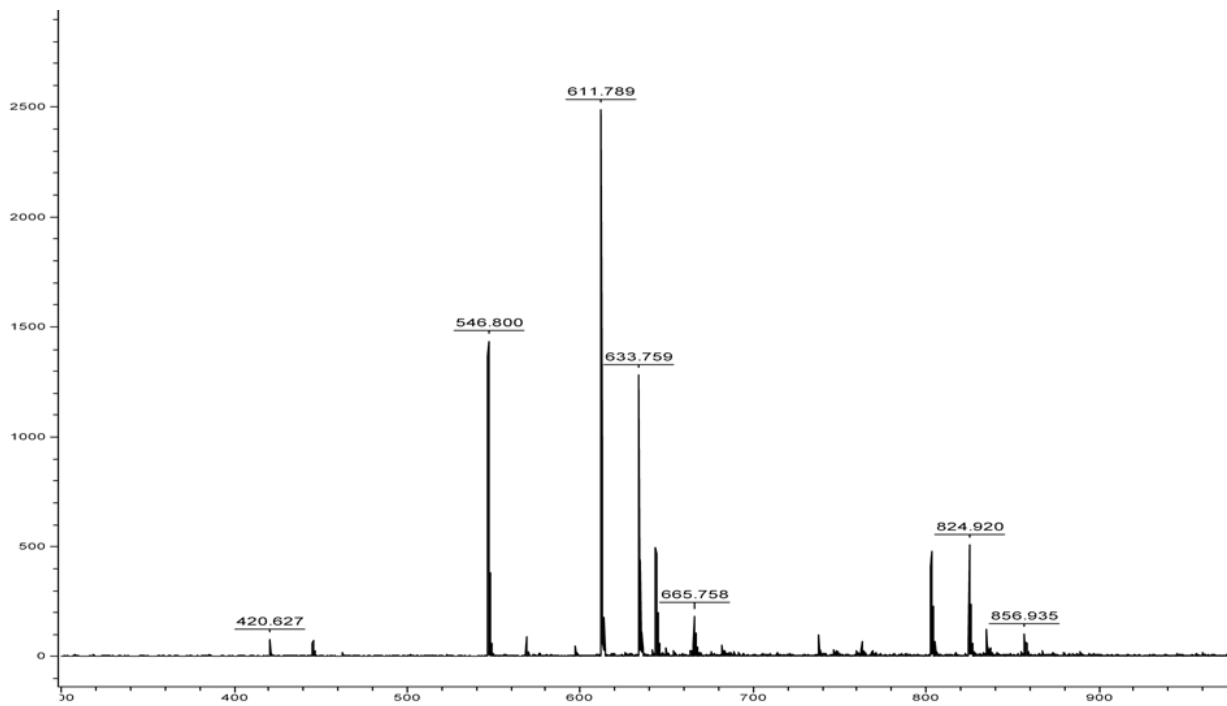

MALDI-MS of His(2-cyclobutyl)-Arg-Arg-NHBzl (**15d**),  $[\text{MH}]^+$  611.78

### His(2-adamantyl)-Arg-Arg-NHBzl (15e):

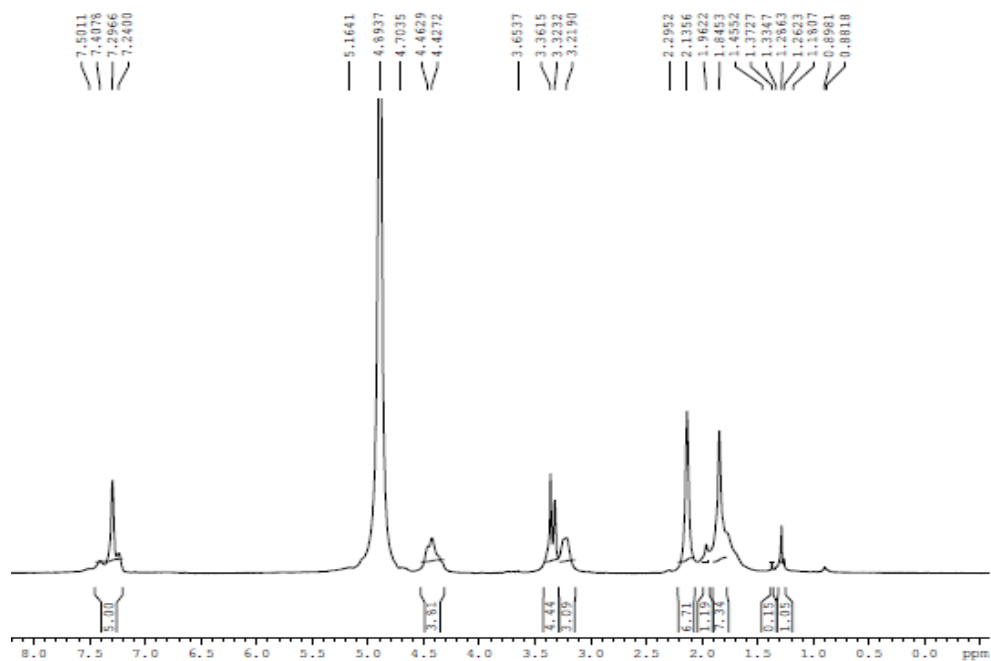

### <sup>1</sup>H-NMR of His(2-adamantyl)-Arg-Arg-NHBzl (15e)

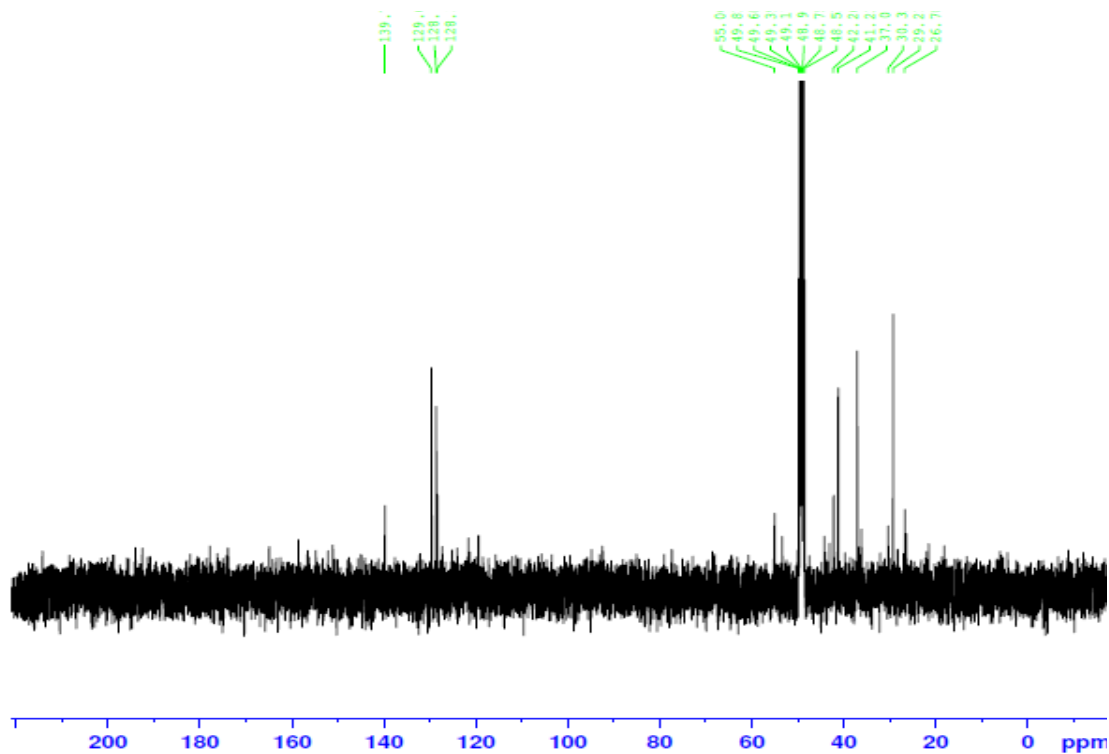

### <sup>13</sup>C-NMR of His(2-adamantyl)-Arg-Arg-NHBzl (15e)

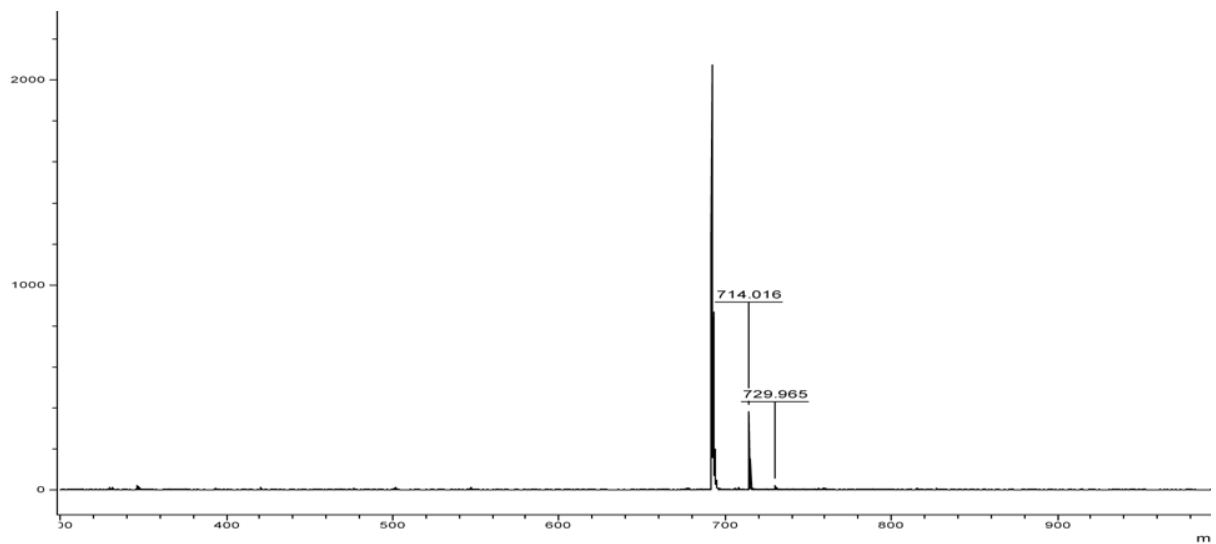

MALDI-MS of His(2-adamantyl)-Arg-Arg-NHBzl (**15e**),  $[MH]^+$  691.02

**His-Arg-Arg-NHBzl (15f):**

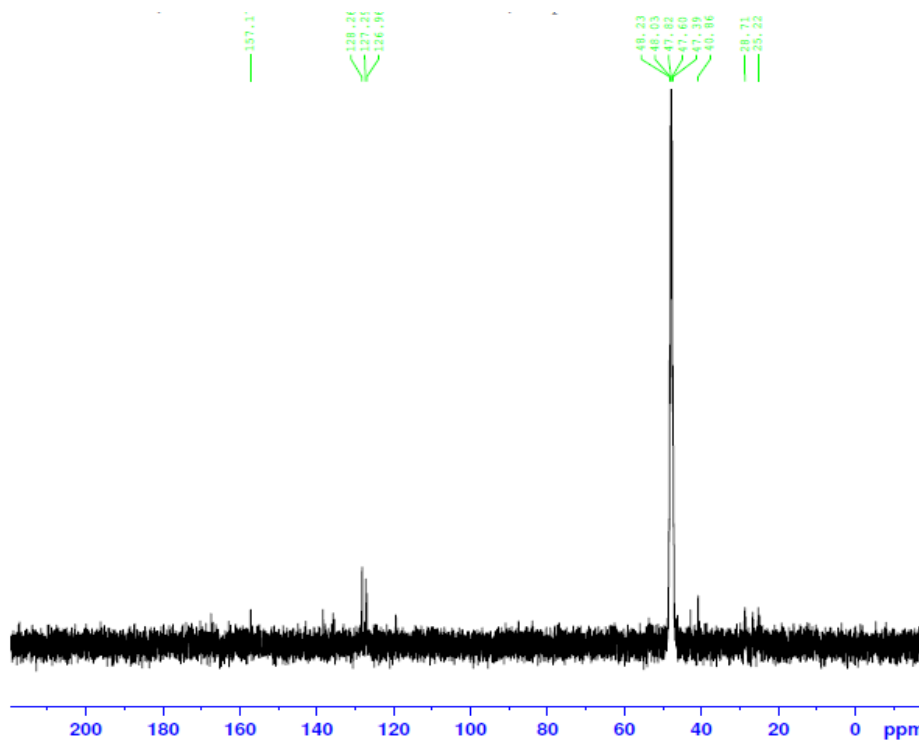

$^{13}C$ -NMR of His-Arg-Arg-NHBzl (**15f**)



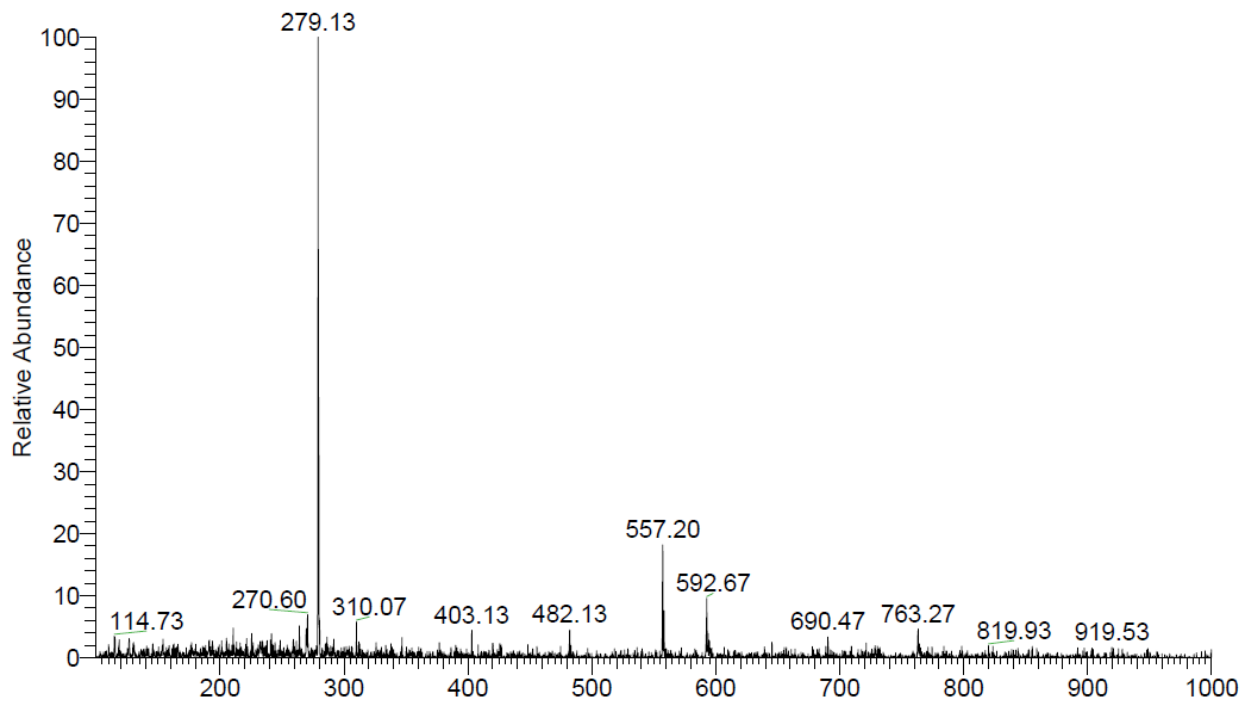

MS of His-Arg-Arg-NHBzl (**15f**),  $[MH]^+$  557.20

**Table S1.** Antifungal activity of synthesized tripeptides (series I and II), MIC values along with standard deviation values of active compounds (Antifungal assay was carried out in three replicates and data expressed as mean  $\pm$  standard deviation).

| No.              | R          | R <sub>1</sub> <sup>[a]</sup> | <i>C. albicans</i><br>MIC <sup>[b]</sup>                                | <i>C. kyfer</i><br>MIC | <i>C. neoformans</i><br>MIC                                               | <i>A. niger</i><br>MIC                                                   | <i>N. crassa</i><br>MIC                                                  |
|------------------|------------|-------------------------------|-------------------------------------------------------------------------|------------------------|---------------------------------------------------------------------------|--------------------------------------------------------------------------|--------------------------------------------------------------------------|
| <b>Series I</b>  |            |                               |                                                                         |                        |                                                                           |                                                                          |                                                                          |
| <b>9a</b>        | t-butyl    | Boc                           | >250                                                                    | >250                   | >250                                                                      | >250                                                                     | >250                                                                     |
| <b>9b</b>        | Cyclohexyl | Boc                           | >250                                                                    | >250                   | >250                                                                      | >250                                                                     | >250                                                                     |
| <b>9c</b>        | i-propyl   | Boc                           | >250                                                                    | >250                   | >250                                                                      | >250                                                                     | >250                                                                     |
| <b>9d</b>        | Cyclobutyl | Boc                           | >250                                                                    | >250                   | >250                                                                      | >250                                                                     | >250                                                                     |
| <b>9e</b>        | Adamantyl  | Boc                           | >250                                                                    | >250                   | <b>112.2 <math>\pm</math> 1.32</b><br><b>(125 <math>\pm</math> 1.48)</b>  | >250                                                                     | <b>112.2 <math>\pm</math> 0.30</b><br><b>(125 <math>\pm</math> 0.34)</b> |
| <b>9f</b>        | H          | Boc                           | >250                                                                    | >250                   | >250                                                                      | >250                                                                     | >250                                                                     |
| <b>10a</b>       | t-butyl    | H                             | >250                                                                    | >250                   | >250                                                                      | >250                                                                     | 250                                                                      |
| <b>10b</b>       | Cyclohexyl | H                             | >250                                                                    | >250                   | >250                                                                      | >250                                                                     | >250                                                                     |
| <b>10c</b>       | i-propyl   | H                             | >250                                                                    | >250                   | >250                                                                      | >250                                                                     | >250                                                                     |
| <b>10d</b>       | Cyclobutyl | H                             | >250                                                                    | >250                   | <b>18.2 <math>\pm</math> 0.97</b><br><b>(31.25 <math>\pm</math> 1.68)</b> | >250                                                                     | >250                                                                     |
| <b>10e</b>       | Adamantyl  | H                             | >250                                                                    | >250                   | >250                                                                      | >250                                                                     | >250                                                                     |
| <b>10f</b>       | H          | H                             | >250                                                                    | >250                   | >250                                                                      | >250                                                                     | >250                                                                     |
| <b>Series II</b> |            |                               |                                                                         |                        |                                                                           |                                                                          |                                                                          |
| <b>14a</b>       | t-butyl    | Boc                           | >250                                                                    | >250                   | <b>44.6 <math>\pm</math> 0.43</b><br><b>(62.5 <math>\pm</math> 0.61)</b>  | >250                                                                     | >250                                                                     |
| <b>14b</b>       | Cyclohexyl | Boc                           | <b>18.5 <math>\pm</math> 0.96</b><br><b>(25 <math>\pm</math> 1.29)</b>  | >250                   | <b>46.2 <math>\pm</math> 1.24</b><br><b>(62.5 <math>\pm</math> 1.68)</b>  | >250                                                                     | >250                                                                     |
| <b>14c</b>       | i-propyl   | Boc                           | >250                                                                    | >250                   | <b>10.9 <math>\pm</math> 1.63</b><br><b>(15.62 <math>\pm</math> 2.35)</b> | >250                                                                     | >250                                                                     |
| <b>14d</b>       | Cyclobutyl | Boc                           | >250                                                                    | >250                   | <b>11.1 <math>\pm</math> 0.22</b><br><b>(15.62 <math>\pm</math> 0.31)</b> | <b>177.8 <math>\pm</math> 0.24</b><br><b>(250 <math>\pm</math> 0.34)</b> | <b>177.8 <math>\pm</math> 0.34</b><br><b>(250 <math>\pm</math> 0.48)</b> |
| <b>14e</b>       | Adamantyl  | Boc                           | <b>98.9 <math>\pm</math> 2.65</b><br><b>(125 <math>\pm</math> 3.34)</b> | >250                   | <b>24.7 <math>\pm</math> 0.19</b><br><b>(31.25 <math>\pm</math> 0.25)</b> | <b>98.9 <math>\pm</math> 3.33</b><br><b>(125 <math>\pm</math> 4.21)</b>  | <b>19.8 <math>\pm</math> 0.18</b><br><b>(25 <math>\pm</math> 0.22)</b>   |
| <b>14f</b>       | H          | Boc                           | >250                                                                    | >250                   | <b>82.1 <math>\pm</math> 0.25</b><br><b>(125 <math>\pm</math> 0.39)</b>   | >250                                                                     | >250                                                                     |
| <b>15a</b>       | t-butyl    | H                             | >250                                                                    | >250                   | <b>9.6 <math>\pm</math> 1.25</b><br><b>(15.62 <math>\pm</math> 2.03)</b>  | >250                                                                     | >250                                                                     |
| <b>15b</b>       | Cyclohexyl | H                             | >250                                                                    | >250                   | <b>1.25 <math>\pm</math> 0.44</b><br><b>(1.95 <math>\pm</math> 0.68)</b>  | >250                                                                     | >250                                                                     |

|            |                   |         |                                           |                                           |                                            |                                           |                              |
|------------|-------------------|---------|-------------------------------------------|-------------------------------------------|--------------------------------------------|-------------------------------------------|------------------------------|
| <b>15c</b> | i-propyl          | H       | >250                                      | >250                                      | <b>74.8 ± 1.26</b><br><b>(125 ± 2.12)</b>  | >250                                      | >250                         |
| <b>15d</b> | Cyclobutyl        | H       | >250                                      | >250                                      | <b>76.4 ± 0.29</b><br><b>(125 ± 0.48)</b>  | >250                                      | >250                         |
| <b>15e</b> | Adamantyl         | H       | <b>86.3 ± 0.30</b><br><b>(125 ± 0.44)</b> | <b>86.3 ± 0.22</b><br><b>(125 ± 0.31)</b> | <b>86.3 ± 0.67</b><br><b>(125 ± 0.98)</b>  | <b>86.3 ± 0.62</b><br><b>(125 ± 0.91)</b> | >250                         |
| <b>15f</b> | H                 | H       | >250                                      | >250                                      | <b>34.8 ± 1.26</b><br><b>(62.5 ± 2.28)</b> | >250                                      | >250                         |
|            | Amphotericin<br>B | control | 0.72 ± 0.06<br>(0.78 ± 0.07)              | 11.5 ± 0.11<br>(12.5 ± 0.12)              | < 0.18 ± 0.16<br>(0.20 ± 0.18)             | 0.36 ± 0.11<br>(0.39 ± 0.12)              | 0.36 ± 0.14<br>(0.39 ± 0.16) |

[a] Refer Figure 1; [b] MIC: Minimum Inhibitory Concentration [in µg/mL (µM)]
